# Supplementary material for: Self-assembly of TiO2 nanoparticles into chains, films and honeycomb networks
Source: Royal Society of Chemistry journal article supplement (doi:10.1039/c3ce41709c), 2014-01-01
Supplement: c3ce41709c.pdf [file c3ce41709c.pdf]

Supporting Information

Self-assembly of TiO<sub>2</sub> Nanoparticles into Chains, Films and  
Honeycomb Networks

Li Luo<sup>a,b</sup>, Peng-peng Wang<sup>a</sup>, Dengwei Jing<sup>\*b</sup>, Xun Wang<sup>\*a</sup>

<sup>a</sup>Department of Chemistry, Tsinghua University, Beijing, 100084, China  
E-mail: wangxun@mail.tsinghua.edu.cn

<sup>b</sup>School of Energy and Power Engineering, Xi'an Jiaotong University, Xi'an 710061,  
P. R. China.  
E-mail: dwjing@mail.xjtu.edu.cn

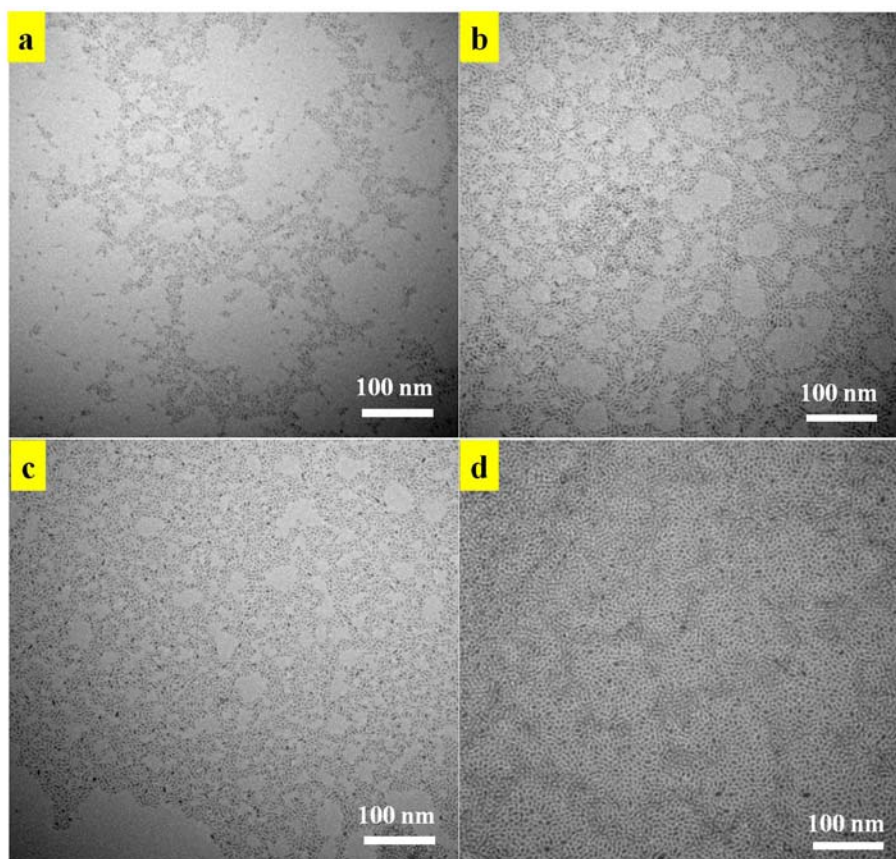

Fig. S1 TEM pictures of the single TiO<sub>2</sub> NPs which obtained in Hydrothermal reaction in the first step, under the same temperature of 150°C with the different reaction time: a) 1h, b) 2h, c) 4h, d) 12h.
